# Supplementary material for: Seroprevalence of Anti-SARS-CoV-2 Antibodies Following the Omicron BA.1 Wave
Source: MDPI journal article supplement (doi:10.3390/ijerph20043665), 2023-02-18
Supplement: s1 [file s1]

**Table S1.** Sample age and gender distribution.

|         | <b>Female (%)</b> | <b>Male (%)</b> |
|---------|-------------------|-----------------|
| 0 - 17  | 137 (6.2)         | 162 (24.1)      |
| 18 - 29 | 686 (30.8)        | 62 (9.2)        |
| 30 - 39 | 682 (30.6)        | 75 (11.2)       |
| 40 - 49 | 208 (9.3)         | 98 (14.6)       |
| 50 - 59 | 223 (10)          | 104 (15.5)      |
| 60 - 69 | 149 (6.7)         | 102 (15.2)      |
| 70 - 79 | 107 (4.8)         | 58 (8.6)        |
| 80+     | 35 (1.6)          | 11 (1.6)        |
| Total   | 2227 (100)        | 672 (100)       |
